# Supplementary material for: Heterogeneous water dynamics in hyaluronan–DPPC interfaces
Source: Royal Society of Chemistry journal article supplement (doi:10.1039/d5cp03169a), 2025-11-25
Supplement: d5cp03169a1.pdf [file d5cp03169a1.pdf]

Supplementary Information:  
Heterogeneous water dynamics in the Hyaluronan-DPPC Interfaces

Anirban Paul<sup>\*a</sup> and Jaydeb Chakrabarti<sup>\*b</sup>

<sup>a</sup>Department of Physics of Complex Systems, S.N. Bose National Centre for Basic Sciences,  
Block JD, Salt Lake, Kolkata-700098, India , email: anirbanpaulhdb@gmail.com,

<sup>b</sup>Department of Chemical and Biological Sciences and the Technical Research Centre, S. N.  
Bose National Centre for Basic Sciences, Block-JD, Sector-III, Salt Lake, Kolkata 700106,  
India , email: jaydeb@bose.res.in

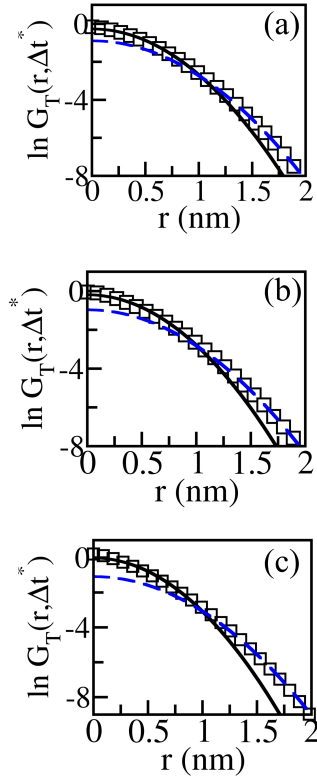

Figure S1:  $\ln G_T(r, \Delta t^*)$  vs  $r$  plot for (a)  $n_{HA5} = 10$ , (b)  $n_{HA5} = 30$ , and (c)  $n_{HA5} = 50$  at  $\Delta t^* = 2.0$  in the diffusive interface. Solid *black* line implies fitted central Gaussian, broken *blue* line shows fitted Gaussian tail.

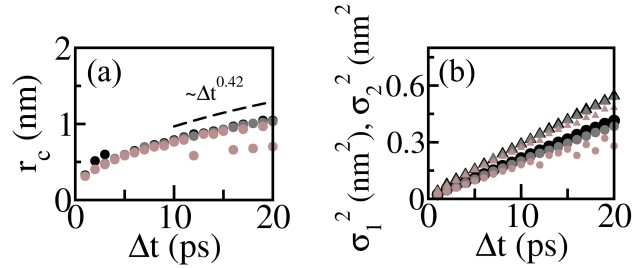

Figure S2: (a) Variation of  $r_c$  with time  $\Delta t$  in the diffusive interface for different  $n_{HA5}$ . (b)  $\sigma_1^2$  vs  $\Delta t$  (*circles*) and  $\sigma_2^2$  vs  $\Delta t$  (*triangles*) for different  $n_{HA5}$ . *Black*, *gray*, and *Brown* symbols imply  $n_{HA5} = 10, 30$  and  $50$  respectively.

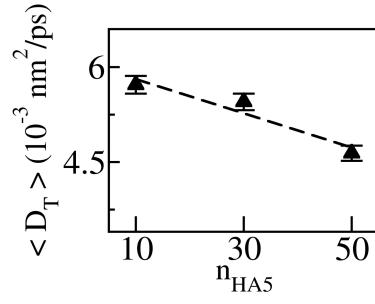

Figure S3:  $\langle D_T \rangle$  for different  $n_{\text{HA5}}$

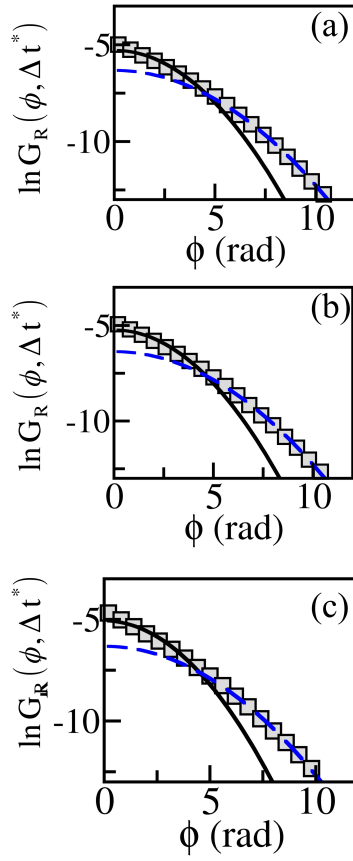

Figure S4:  $\ln G_R(\phi, \Delta t^*)$  vs  $\phi$  plot for (a)  $n_{\text{HA5}} = 10$ , (b)  $n_{\text{HA5}} = 30$ , and (c)  $n_{\text{HA5}} = 50$  at  $\Delta t^* = 2.0$  in the diffusive interface. Solid black line implies fitted central Gaussian, broken blue line shows fitted Gaussian tail.

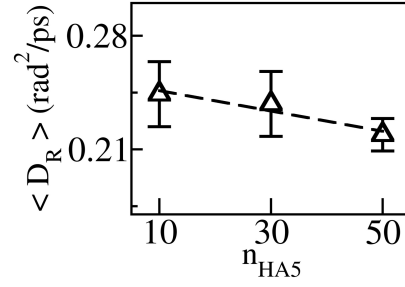

Figure S5:  $\langle D_R \rangle$  for different  $n_{\text{HA5}}$

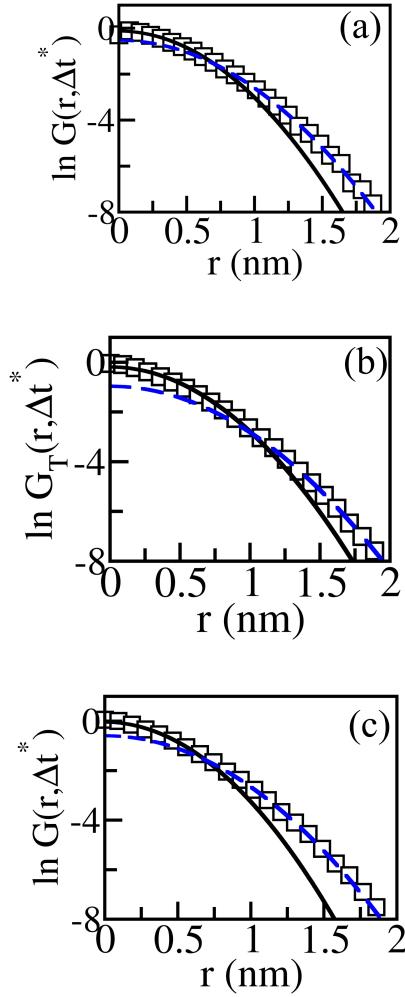

Figure S6:  $\ln G_T(r, \Delta t^*)$  vs  $r$  plot for (a)  $N=1$ , (b)  $N=5$ , and (c)  $N=10$  at  $\Delta t^* = 2.0$  in the diffusive interface. *Solid* black line implies fitted central Gaussian, *broken* blue line shows fitted Gaussian tail.



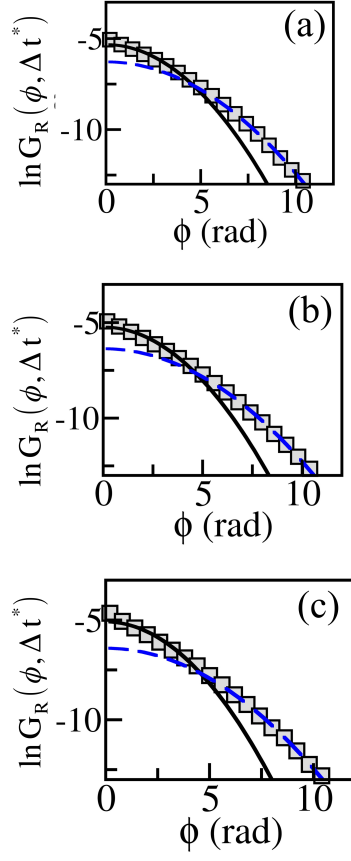

Figure S7:  $\ln G_R(\phi, \Delta t^*)$  vs  $\phi$  plot for (a)  $N=1$ , (b)  $N=5$ , and (c)  $N=10$  at  $\Delta t^* = 2.0$  in the diffusive interface. *Solid* black line implies fitted central Gaussian, *broken* blue line shows fitted Gaussian tail.

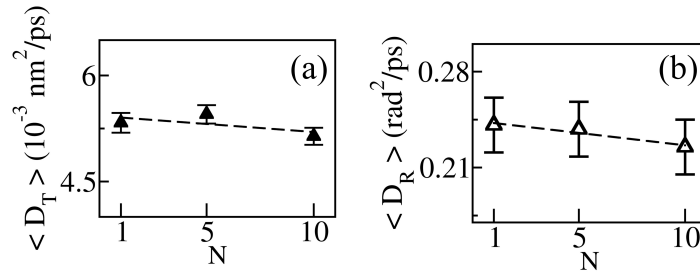

Figure S8: (a)  $\langle D_T \rangle$  for different  $N$  (b)  $\langle D_R \rangle$  for different  $N$ .

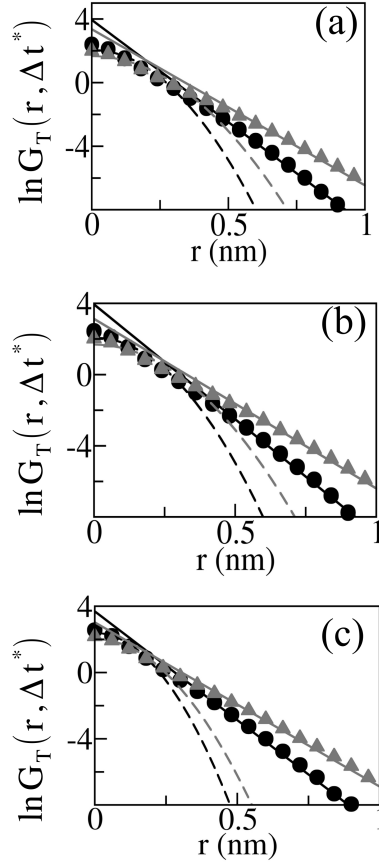

Figure S9:  $\ln G_T(r, \Delta t^*)$  vs  $r$  plot for (a)  $n_{HA5} = 10$ , (b)  $n_{HA5} = 30$ , and (c)  $n_{HA5} = 50$  at  $\Delta t^* = 0.5$  (circles) and  $\Delta t^* = 1.0$  (triangles) in the subdiffusive hydration layer. Broken and solid lines show the fitted central Gaussian and fitted exponential tail, respectively.

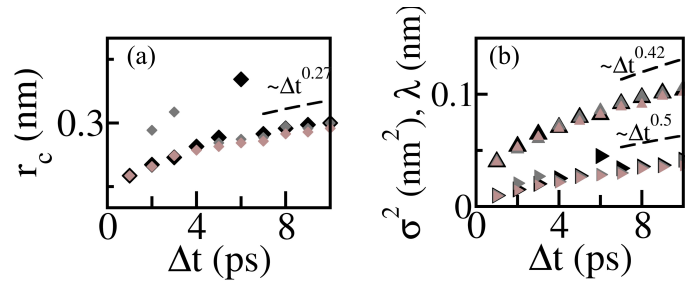

Figure S10: (a) Variation of  $r_c$  of  $G_T(r, \Delta t)$  with time  $\Delta t$  for different  $n_{HA5}$  in the hydration layer. (b)  $\sigma^2$  vs  $\Delta t$  ( $\blacktriangleright$ ) and  $\lambda$  vs  $\Delta t$  ( $\blacktriangle$ ) for different  $n_{HA5}$ . Black, gray, and Brown symbols imply  $n_{HA5} = 10, 30$  and  $50$  respectively.

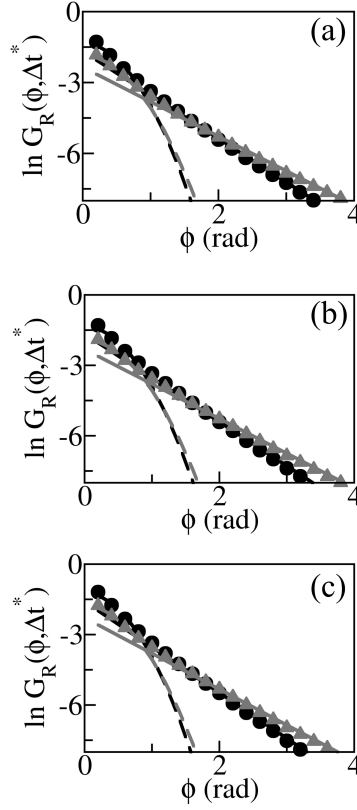

Figure S11:  $\ln G_R(\phi, \Delta t^*)$  vs  $\phi$  plot for (a)  $n_{HA5}=10$ , (b)  $n_{HA5}=30$ , and (c)  $n_{HA5}=50$  at  $\Delta t^* = 0.5$  (circles) and  $\Delta t^* = 1.0$  (triangles) in the subdiffusive hydration layer. Broken line shows central Gaussian, solid line implies exponential tail.

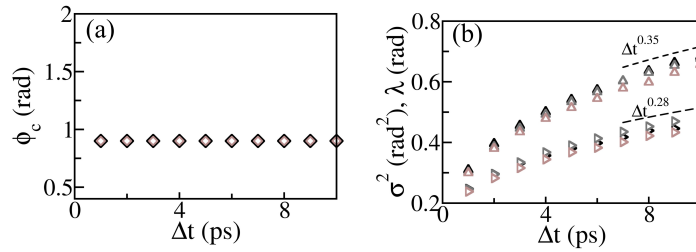

Figure S12: (a) Variation of crossover angle  $\phi_c$  of  $G_R(\phi, \Delta t)$  in the hydration layer with time  $\Delta t$  for different  $n_{HA5}$ . (b)  $\sigma^2$  vs  $\Delta t$  ( $\triangleright$ ) and  $\lambda$  vs  $\Delta t$  ( $\triangle$ ) of  $G_R(\phi, \Delta t)$  for different  $n_{HA5}$ . Black, gray, and Brown symbols imply  $n_{HA5}=10, 30$  and  $50$  respectively.

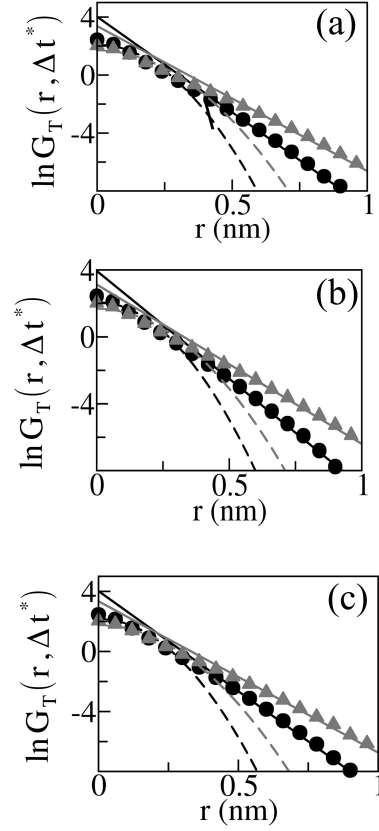

Figure S13:  $\ln G_T(r, \Delta t^*)$  vs  $r$  plot for (a)  $N = 1$ , (b)  $N = 5$ , and (c)  $N = 10$  at  $\Delta t^* = 0.5$  (circles) and  $\Delta t^* = 1.0$  (triangles) in the subdiffusive hydration layer. *Broken* line shows central Gaussian, *solid* line implies exponential tail.

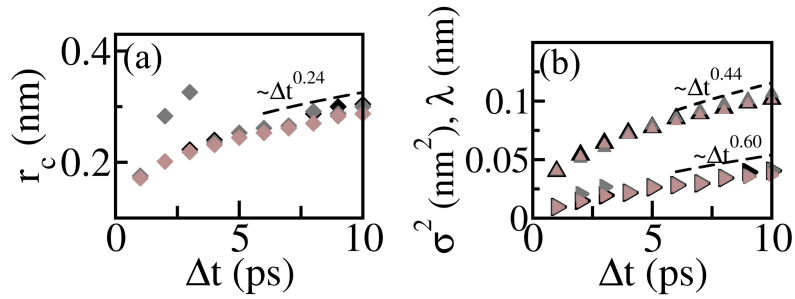

Figure S14: The crossover length  $r_c$  of  $G_T(r, \Delta t)$  vs time  $\Delta t$  for different  $N$  in the hydration layer. (b)  $\sigma^2$  vs  $\Delta t$  ( $\blacktriangleright$ ) and  $\lambda$  vs  $\Delta t$  ( $\blacktriangle$ ) for different  $N$ . *Black*, *gray*, and *Brown* symbols imply  $N=1, 5$  and  $10$  respectively.

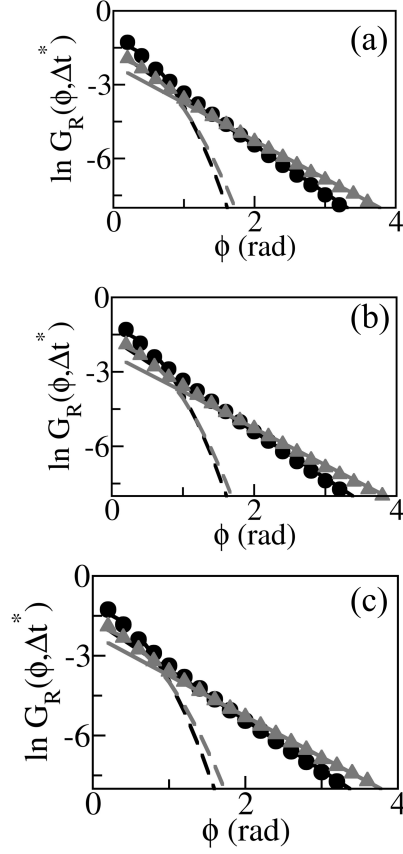

Figure S15:  $\ln G_R(\phi, \Delta t^*)$  vs  $\phi$  plot for (a)  $N = 1$ , (b)  $N = 5$ , and (c)  $N = 10$  at  $\Delta t^* = 0.5$  (*circles*) and  $\Delta t^* = 1.0$  (*triangles*) in the subdiffusive hydration layer. *Broken* line shows Gaussian tail, *solid* line implies exponential tail.

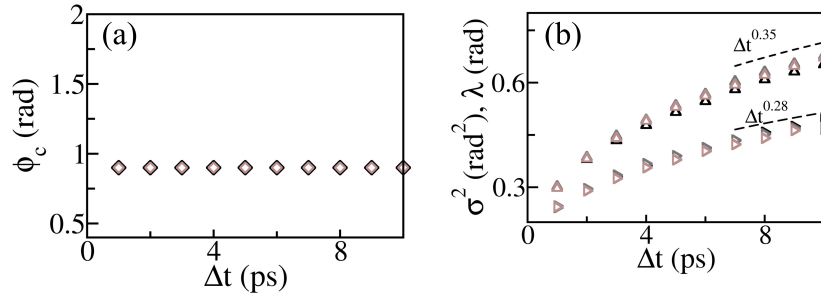

Figure S16: Crossover angle  $\phi_c$  of  $G_R(\phi, \Delta t)$  vs time  $\Delta t$  for different  $N$  in the hydration layer. (b)  $\sigma^2$  vs  $\Delta t$  ( $\triangleright$ ) and  $\lambda$  vs  $\Delta t$  ( $\triangle$ ) for different  $N$ . *Black*, *gray*, and *Brown* symbols imply  $N=1, 5$  and  $10$  respectively.

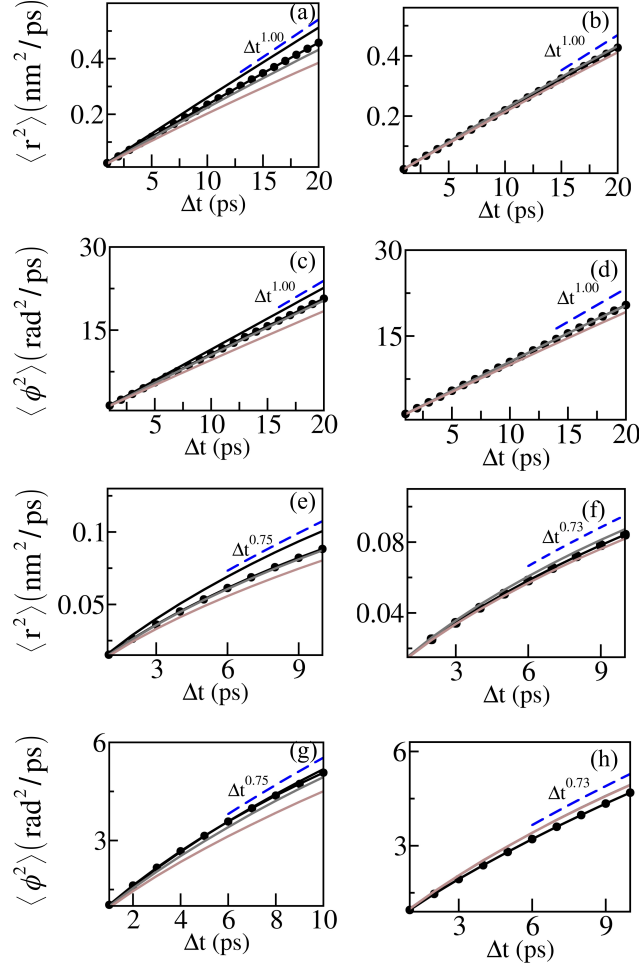

Figure S17: (a) Translational MSD of water  $\langle r^2 \rangle$  in the diffusive interface for different  $n_{HA5}$  ( $n_{HA5} = 0$  (solid black line),  $n_{HA5} = 10$  (dotted black line),  $n_{HA5} = 30$  (gray line),  $n_{HA5} = 50$  (brown line) and (b) different  $N$  ( $N=1$  (dotted black line),  $N=5$  (gray line),  $N=10$  (brown line)). (c) Rotational MSD of water  $\langle \phi^2 \rangle$  in the diffusive interface for different  $n_{HA5}$  ( $n_{HA5} = 0$  (solid black line),  $n_{HA5} = 10$  (dotted black line),  $n_{HA5} = 30$  (gray line),  $n_{HA5} = 50$  (brown line) and (d) different  $N$  ( $N=1$  (dotted black line),  $N=5$  (gray line),  $N=10$  (brown line)). (e) Translational MSD of water  $\langle r^2 \rangle$  in the subdiffusive hydration layer for different  $n_{HA5}$  and (f) different  $N$ . Same linetypes are used as (a)-(b). (g) Rotational MSD of water  $\langle \phi^2 \rangle$  in the subdiffusive hydration layer for different  $n_{HA5}$  and (h) different  $N$ . Same linetypes are used as (c)-(d).
